# Supplementary material for: Electronic and electrochemical properties as well as flowerlike supramolecular assemblies of fulleropyrrolidines bearing ester substituents with different alkyl chain lengths
Source: Royal Society of Chemistry journal article supplement (doi:10.1039/c4ra10654g), 2014-01-01
Supplement: c4ra10654g1.pdf [file c4ra10654g1.pdf]

## *Electronic Supplementary Information*

*for*

### **Electronic and Electrochemical Properties as well as Flowerlike Supramolecular Assemblies of Fulleropyrrolidines Bearing Ester Substituent with Different Alkyl Chain Length**

Xuan Zhang\*, Xu-Dong Li, Li-Xia Ma, Bei Zhang

*College of Chemistry, Chemical Engineering & Biotechnology, Donghua University, Shanghai 201620, China.*

*Corresponding Author: xzhang@dhu.edu.cn*

**Table S1** Comparison of HOMO energy, LUMO energy, and HOMO-LUMO energy gap ( $E_{\text{gap}}$ ) of  $C_{60}$  and PCBM calculated with B3LYP and PBE basis sets, as well as the values from experimental measurements.

| Compd.   | Parameters            | Exp. values        | B3LYP/<br>6-311G(d,p) <sup>c</sup> | PBEPBE/<br>6-311G(d,p) <sup>c</sup> | PBEPBE/<br>6-311G(d,p) <sup>d</sup> |
|----------|-----------------------|--------------------|------------------------------------|-------------------------------------|-------------------------------------|
| $C_{60}$ | HOMO / eV             | -6.1 <sup>a</sup>  | -6.401                             | -5.867                              | -5.863                              |
|          | LUMO / eV             | -4.3 <sup>a</sup>  | -3.678                             | -4.181                              | -4.210                              |
|          | $E_{\text{gap}}$ / eV | 1.8 <sup>a</sup>   | 2.723                              | 1.686                               | 1.653                               |
| PCBM     | HOMO / eV             | -5.55 <sup>b</sup> | -6.049                             | -5.522                              | -5.517                              |
|          | LUMO / eV             | -3.83 <sup>b</sup> | -3.522                             | -4.006                              | -4.032                              |
|          | $E_{\text{gap}}$ / eV | 1.72 <sup>b</sup>  | 2.527                              | 1.516                               | 1.485                               |

<sup>a</sup> Cited from ref. S1. <sup>b</sup> Cited from ref. S2. <sup>c</sup> Based on the geometry optimized at B3LYP/6-31G(d) level. <sup>d</sup> Based on the geometry optimized at PBEPBE/6-311G(d,p) level.

**Table S2** LUMO, HOMO, and molecular properties of the C<sub>60</sub>, PCBM and **FP1–FP4** fullerenes calculated by DFT at PBEPBE/6-311G(d,p) level.

| Molecular properties <sup>a</sup>    | C <sub>60</sub> | PCBM   | <b>FP1</b> | <b>FP2</b> | <b>FP3</b> | <b>FP4</b> |
|--------------------------------------|-----------------|--------|------------|------------|------------|------------|
| LUMO [eV]                            | -4.181          | -4.006 | -4.017     | -4.012     | -4.010     | -4.007     |
| HOMO [eV]                            | -5.867          | -5.522 | -5.515     | -5.510     | -5.508     | -5.507     |
| Ionization potential (I)             | 5.867           | 5.522  | 5.515      | 5.510      | 5.508      | 5.507      |
| Electron affinity (A)                | 4.181           | 4.006  | 4.017      | 4.012      | 4.010      | 4.007      |
| Electronegativity ( $\chi$ )         | 5.024           | 4.764  | 4.766      | 4.761      | 4.759      | 4.757      |
| Global hardness ( $\eta$ )           | 0.8432          | 0.7578 | 0.7491     | 0.7489     | 0.7491     | 0.7502     |
| Global softness (S)                  | 1.186           | 1.319  | 1.335      | 1.335      | 1.335      | 1.333      |
| Chemical potential ( $\mu$ )         | -5.024          | -4.764 | -4.766     | -4.761     | -4.759     | -4.757     |
| Global electrophilicity ( $\omega$ ) | 14.96           | 14.98  | 15.16      | 15.13      | 15.11      | 15.08      |

<sup>a</sup> The definitions of these properties are described in the ref. S3-S5.

**Table S3** MO energies of the **FP1–FP4** fullerenes calculated by DFT at PBE/PBE/6-311G(d,p) level, where the HOMO and LUMO were indicated in bold font.

| <b>FP1</b>    |              | <b>FP2</b>    |              | <b>FP3</b>    |              | <b>FP4</b>    |              |
|---------------|--------------|---------------|--------------|---------------|--------------|---------------|--------------|
| Energy (eV)   | MO           |
| -2.363        | MO239        | -2.338        | MO243        | -2.332        | MO247        | -2.326        | MO251        |
| -2.583        | MO238        | -2.578        | MO242        | -2.576        | MO246        | -2.575        | MO250        |
| -2.816        | MO237        | -2.811        | MO241        | -2.808        | MO245        | -2.807        | MO239        |
| -2.856        | MO236        | -2.851        | MO240        | -2.848        | MO244        | -2.846        | MO238        |
| -2.918        | MO235        | -2.914        | MO239        | -2.912        | MO243        | -2.911        | MO247        |
| -3.705        | MO234        | -3.701        | MO238        | -3.699        | MO242        | -3.698        | MO246        |
| -3.936        | MO233        | -3.931        | MO237        | -3.929        | MO241        | -3.927        | MO245        |
| <b>-4.017</b> | <b>MO232</b> | <b>-4.012</b> | <b>MO236</b> | <b>-4.009</b> | <b>MO240</b> | <b>-4.007</b> | <b>MO244</b> |
| <b>-5.515</b> | <b>MO231</b> | <b>-5.510</b> | <b>MO235</b> | <b>-5.508</b> | <b>MO239</b> | <b>-5.507</b> | <b>MO243</b> |
| -5.641        | MO230        | -5.635        | MO234        | -5.633        | MO238        | -5.631        | MO242        |
| -5.648        | MO229        | -5.642        | MO233        | -5.640        | MO237        | -5.639        | MO241        |
| -5.688        | MO228        | -5.683        | MO232        | -5.680        | MO236        | -5.679        | MO240        |
| -5.723        | MO227        | -5.710        | MO231        | -5.710        | MO235        | -5.709        | MO239        |
| -6.036        | MO226        | -6.032        | MO230        | -6.029        | MO234        | -6.028        | MO238        |
| -6.345        | MO225        | -6.287        | MO229        | -6.280        | MO233        | -6.270        | MO237        |
| -6.534        | MO224        | -6.525        | MO228        | -6.521        | MO232        | -6.519        | MO236        |

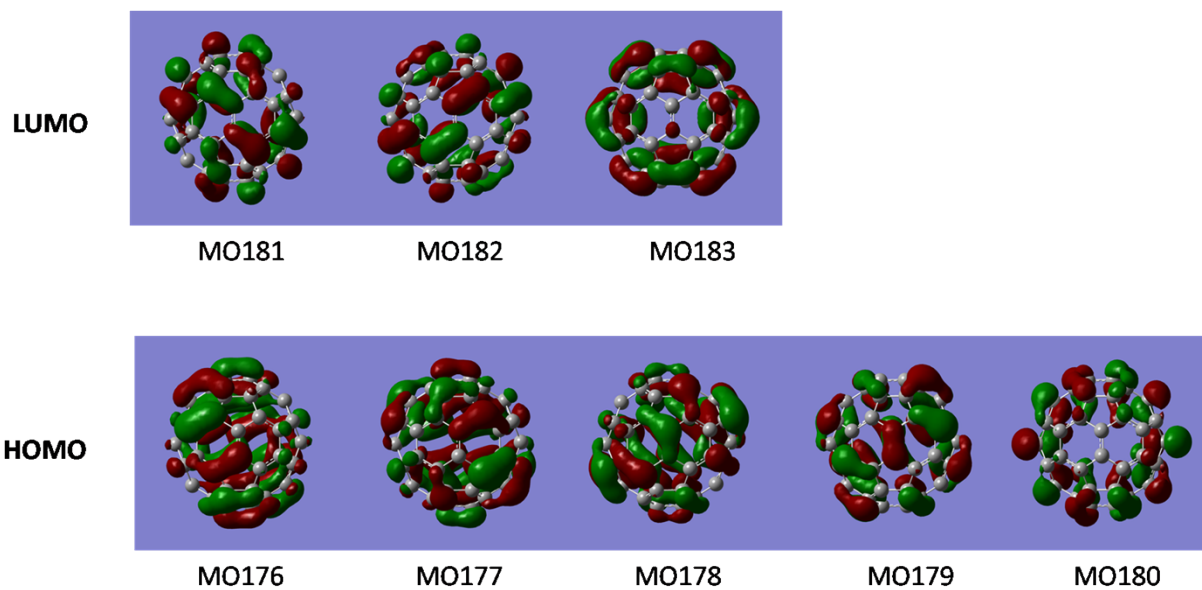

**Fig. S1** Contours of 3-fold degenerated LUMOs and 5-fold degenerated HOMOs of  $C_{60}$  calculated by DFT at PBE/PBE/6-311G(d,p) level.

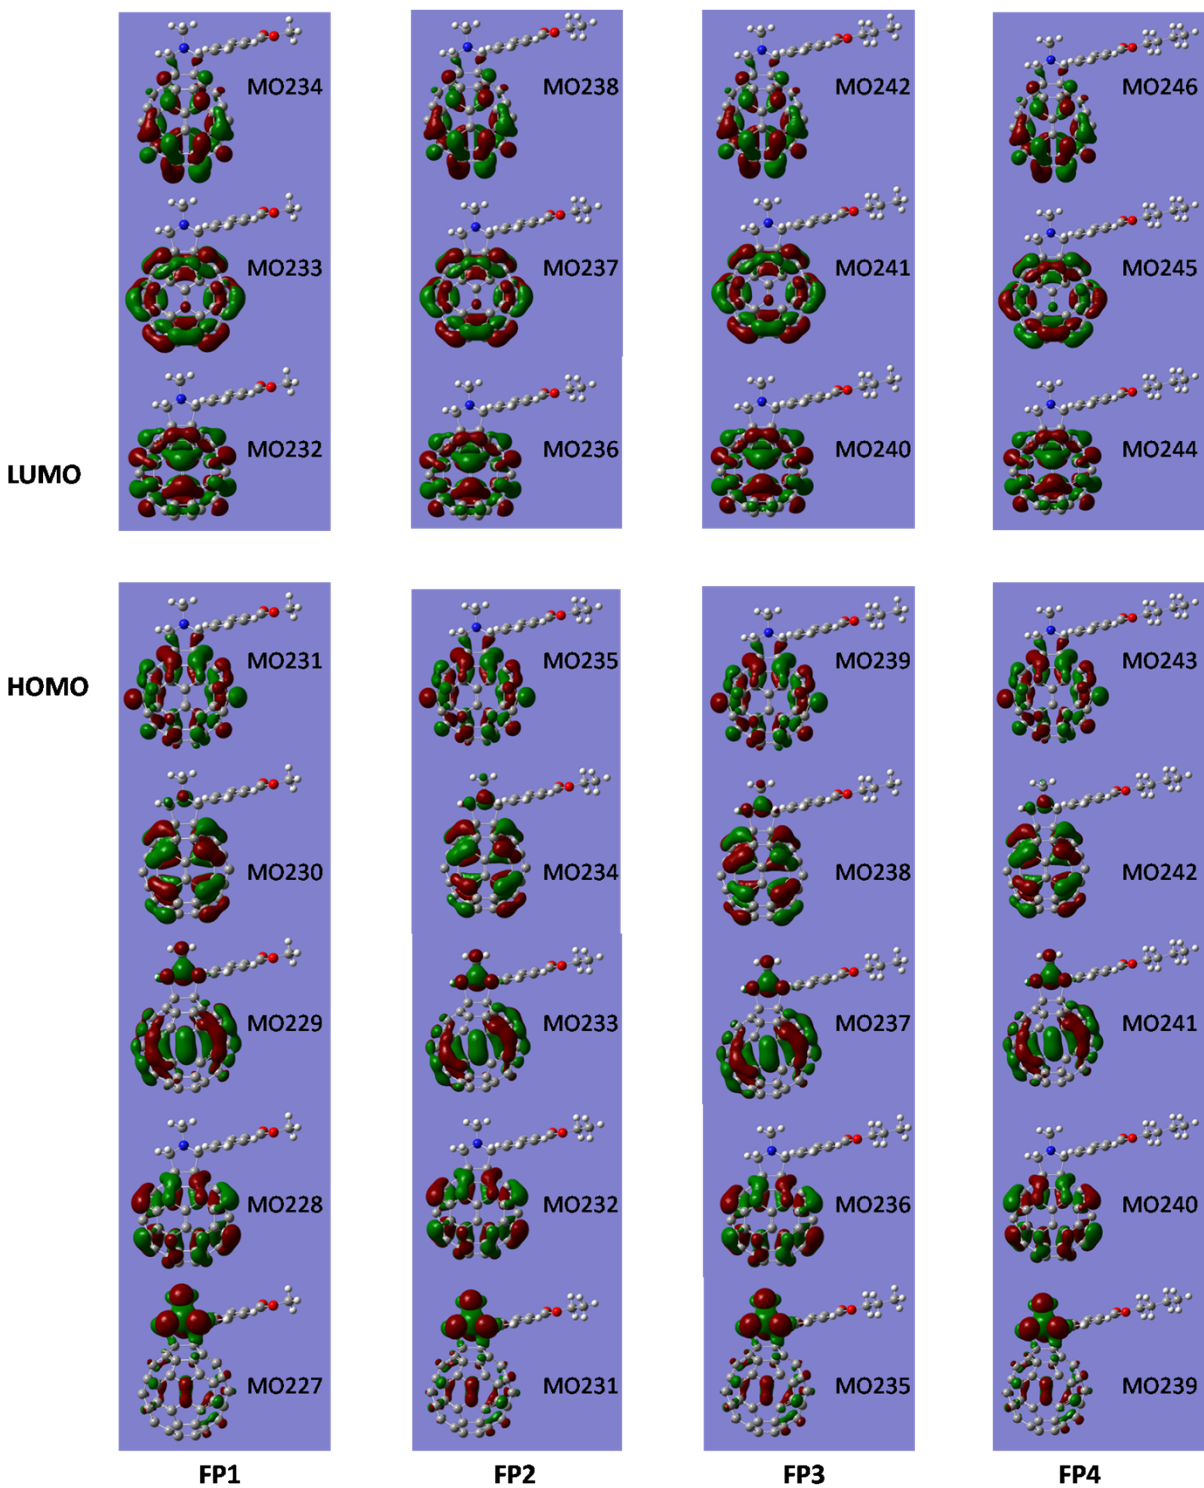

**Fig. S2** Contours of the related eight non-degenerated MOs of the **FP1–FP4** fullerenes calculated by DFT at PBE/PBE/6-311G(d,p) level.

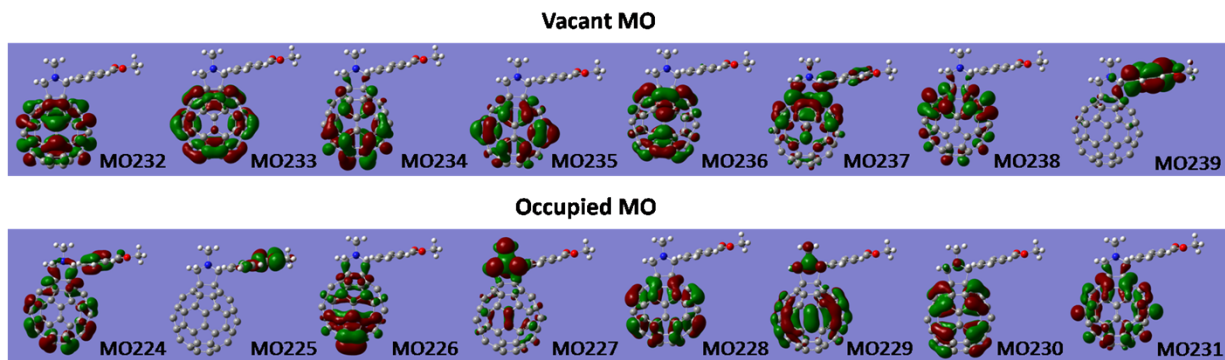

**Fig. S3** Contours of the MOs of the **FP1** calculated by DFT at PBE/PBE/6-311G(d,p) level.

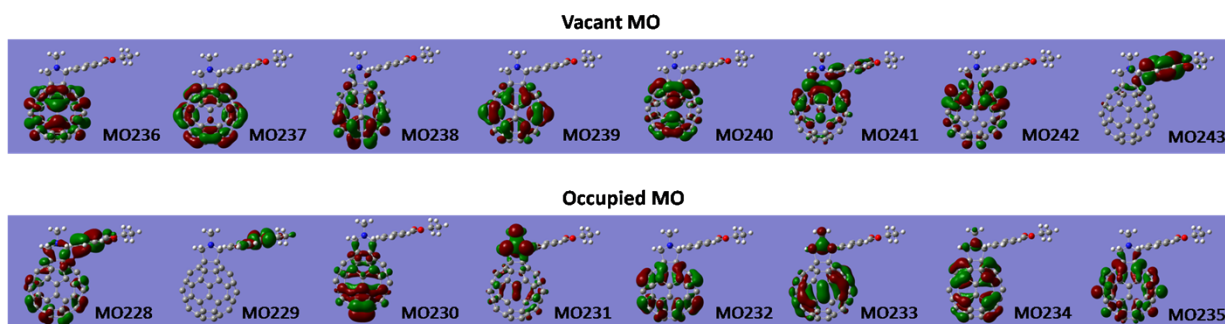

**Fig. S4** Contours of the MOs of the **FP2** calculated by DFT at PBE/PBE/6-311G(d,p) level.

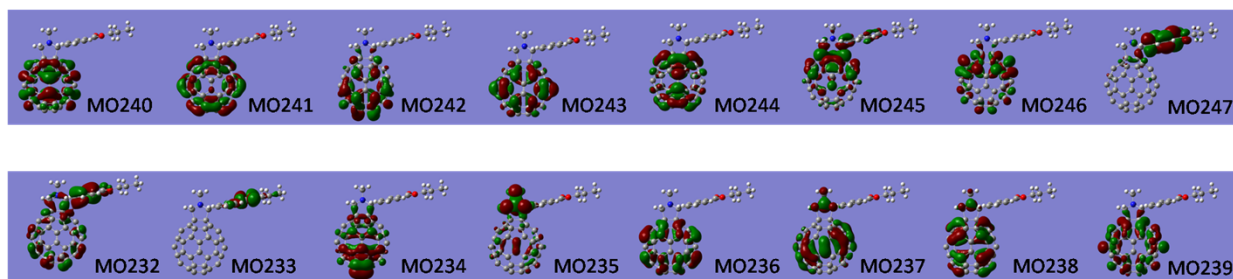

**Fig. S5** Contours of the MOs of the **FP3** calculated by DFT at PBE/PBE/6-311G(d,p) level.

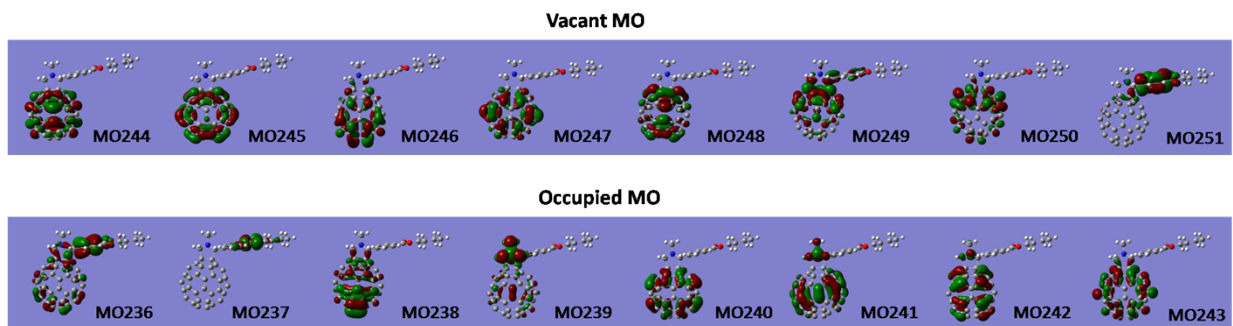

**Fig. S6** Contours of the MOs of the **FP4** calculated by DFT at PBE/PBE/6-311G(d,p) level.

## References

- [S1] R. Koeppel, N.S. Sariciftci, *Photochem. Photobiol. Sci.* 2006, **5**, 1122–1131.
- [S2] G. D. Han, W. R. Collins, T. L. Andrew, V. Bulović and T. M. Swager. *Adv. Funct. Mater.* 2013, **23**, 3061–3069.
- [S3] R. G. Parr, L. v. Szentpály, S. Liu. *J. Am. Chem. Soc.* 1999, **121**, 1922–1924.
- [S4] P. W. Ayers, R. G. Parr. *J. Am. Chem. Soc.* 2000, **122**, 2010–2018.
- [S5] R. G. Parr, Z. Zhou. *Acc. Chem. Res.* 1993, **26**, 256–258.
